# Supplementary material for: Controlled in vitro release of CBD from oleosomes via modulation of their membrane density
Source: Royal Society of Chemistry journal article supplement (doi:10.1039/d4fo04171b), 2025-01-01
Supplement: d4fo04171b2.pdf [file d4fo04171b2.pdf]

Supplementary information

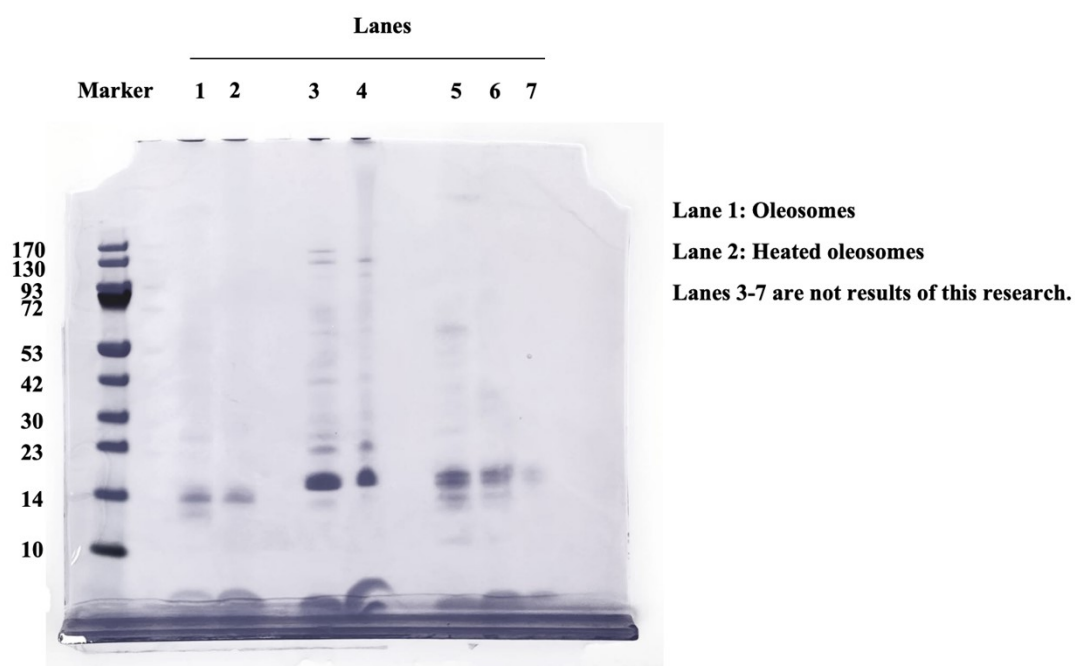

Protein profiles of native oleosomes and heated oleosomes by SDS-PAGE. Line 1 is native oleosomes. Line 2 is heated oleosomes. Lines 3-7 are not the results of this research.
